# Supplementary material for: Testing the 2020 European Seismic Hazard Model (ESHM20) against observations from Romania
Source: Copernicus journal article supplement (doi:10.5194/nhess-25-1-2025), 2025-01-02
Supplement: Supplementary file 1 [file nhess-25-1-2025-supplement.pdf]

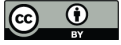

*Supplement of*

## **Testing the 2020 European Seismic Hazard Model (ESHM20) against observations from Romania**

**Elena F. Manea et al.**

*Correspondence to:* Elena F. Manea (flory.manea88@gmail.com) and Laurentiu Danciu (laurentiu.danciu@sed.ethz.ch)

The copyright of individual parts of the supplement might differ from the article licence.

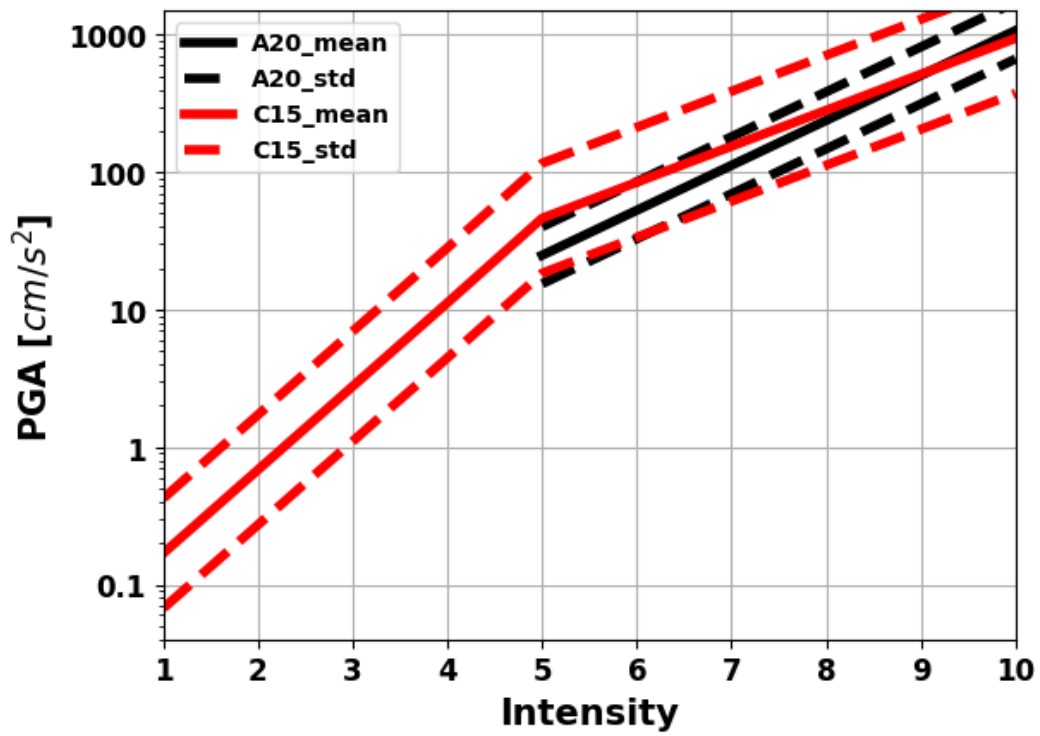

Figure S1. The distribution of the MSK-64 Intensity to PGA conversions for the two selected equations (Ardeleanu et al., 2020 – A20 and Caprio et al., 2015 – C15) and their corresponding standard deviations.

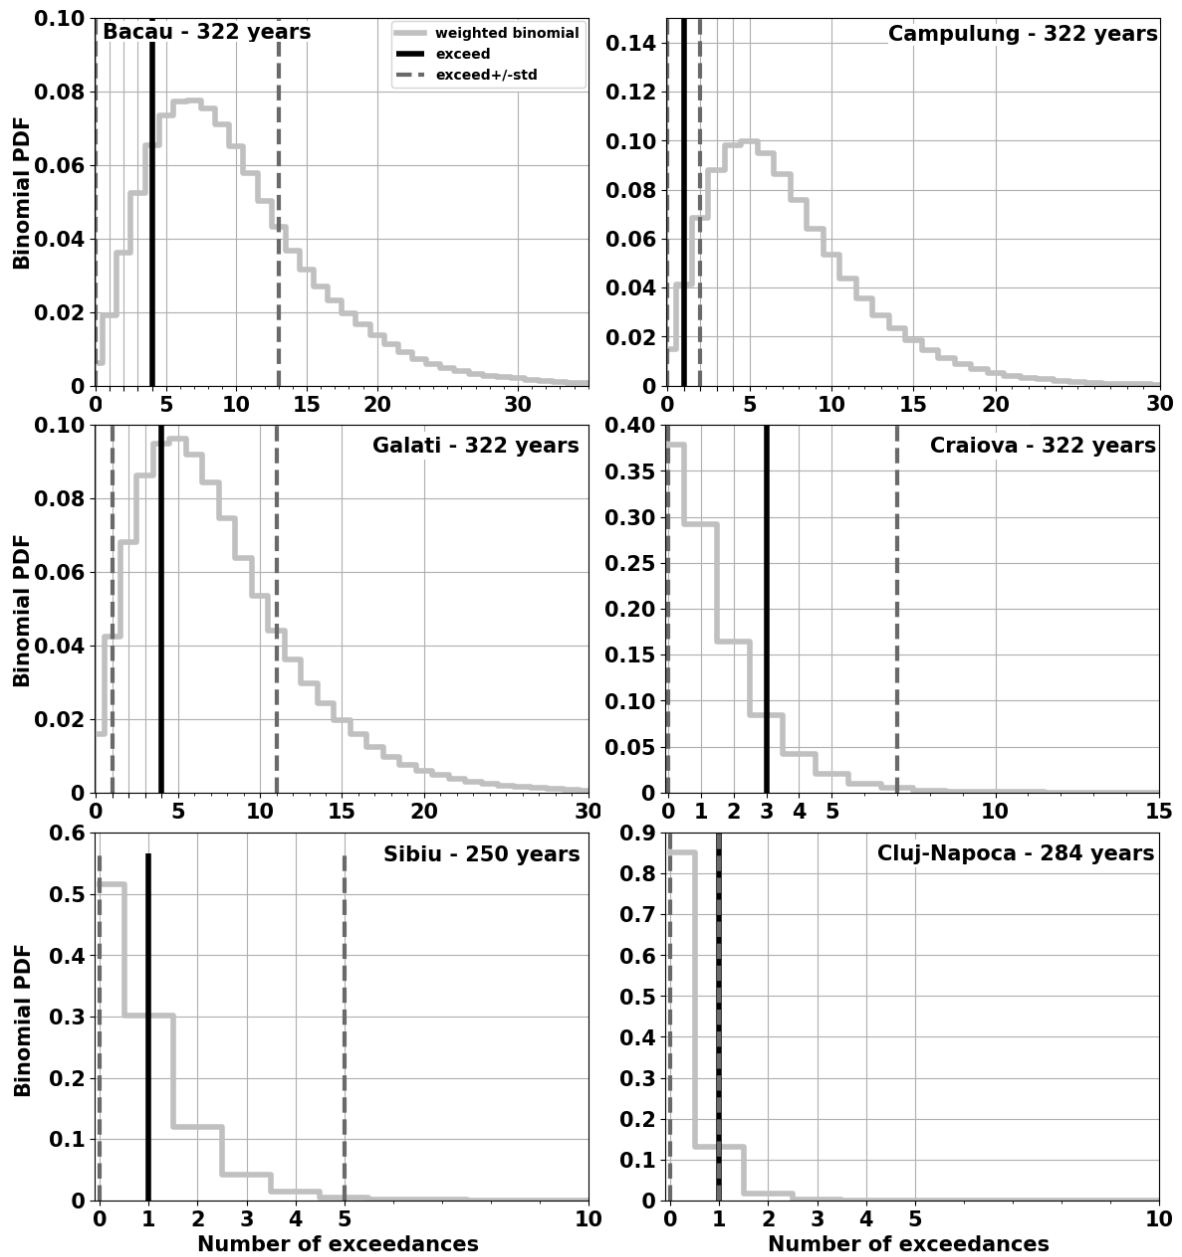

Figure S2. Consistency test results of ESHM20 with the observed PGA values at 0.1 g for Romanian cities. Where: ESHM weighted mean predicted - histogram, the observed number of exceedances - black line and its one sigma variability - dashed vertical lines; the total completeness time is specified in each subplot for their respective city.

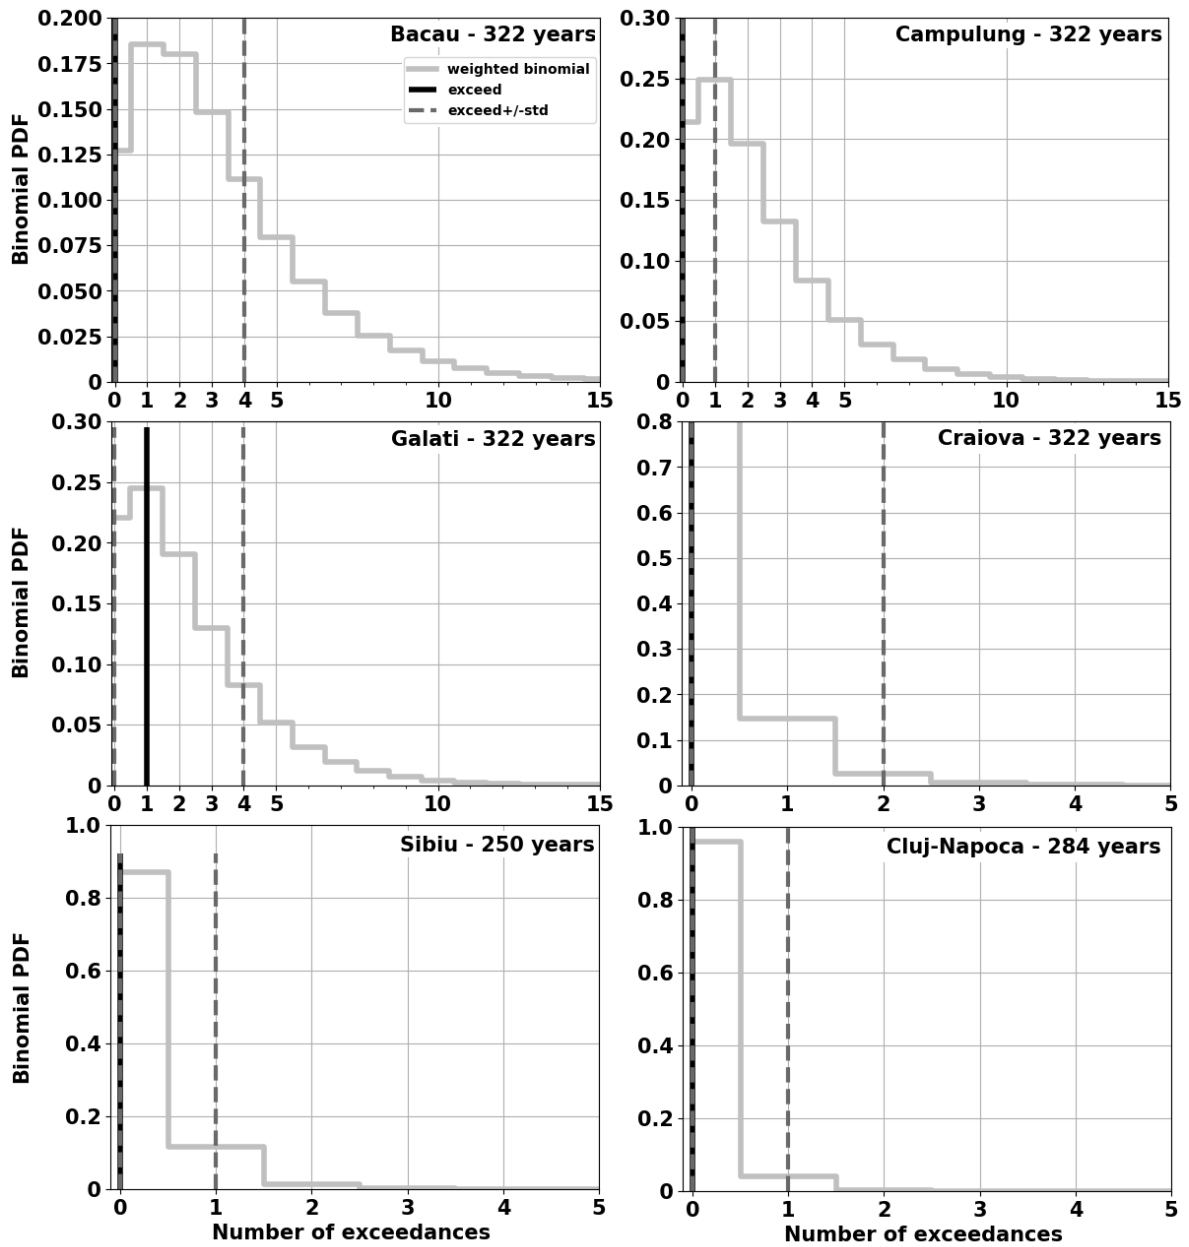

Figure S3. Consistency test results of ESHM20 with the observed PGA values at 0.2 g for Romanian cities. Where: ESHM weighted mean predicted - histogram, the observed number of exceedances - black line and its one sigma variability - dashed vertical lines; the total completeness time is specified in each subplot for their respective city.
